## CALCIUM PUMP ACTIVITIES IN THE KIDNEYS OF *OREOCHROMIS MOSSAMBICUS*

MARCEL J. C. BIJVELDS<sup>1,2</sup>, ANGELIQUE J. H. VAN DER HEIJDEN<sup>1</sup>, GERT FLIK<sup>1</sup>, PIETER M. VERBOST<sup>1</sup>,  
ZVONIMIR I. KOLAR<sup>2</sup> AND SJOERD E. WENDELAAR BONGA<sup>1</sup>

<sup>1</sup>Department of Animal Physiology, Faculty of Science, University of Nijmegen, Toernooiveld, 6525 ED Nijmegen, The Netherlands and <sup>2</sup>Department of Radiochemistry, Interfaculty Reactor Institute, Delft University of Technology, Mekelweg 15, 2629 JB Delft, The Netherlands

Accepted 20 February 1995

### Summary

The mechanism that underlies transcellular  $\text{Ca}^{2+}$  reabsorption in the kidney of the euryhaline teleost *Oreochromis mossambicus* was studied. Preparations of membrane vesicles made from the kidneys of freshwater- and seawater-adapted fish were more than sevenfold enriched in the basolateral plasma membrane marker  $\text{Na}^+/\text{K}^+$ -ATPase. Significant recovery of NADH-cytochrome *c* reductase enzyme activity and of oxalate-stimulated  $\text{Ca}^{2+}$  pump activities in the membrane preparations indicated that the membrane fraction was of endoplasmic reticular origin. Indeed, thapsigargin specifically inhibited  $\text{Ca}^{2+}$  pump activity that could be attributed to oxalate-permeable endoplasmic reticular fragments. Kinetic analysis of thapsigargin-insensitive

$\text{Ca}^{2+}$  pump activity indicated the existence of a homogeneous, high-affinity, ATP-driven  $\text{Ca}^{2+}$  pump. No  $\text{Na}^+$ -driven  $\text{Ca}^{2+}$  transport mechanism could be demonstrated. Plasma membrane  $\text{Ca}^{2+}$  pump activity was 56% lower in preparations from seawater-adapted fish than in preparations from freshwater-adapted fish, suggesting a physiological role for this  $\text{Ca}^{2+}$  pump activity in renal  $\text{Ca}^{2+}$  handling by euryhaline species, with an involvement in the regulation of  $\text{Ca}^{2+}$  reabsorption.

Key words: divalent cation transport, calcium transport, teleost osmoregulation, plasma membrane vesicles, thapsigargin, *Oreochromis mossambicus*.

### Introduction

In euryhaline teleosts the kidney maintains  $\text{Ca}^{2+}$  homeostasis over a wide range of ambient  $\text{Ca}^{2+}$  concentrations. In sea water (SW) these fish are confronted with a constant  $\text{Ca}^{2+}$  influx from a hypercalcemic environment and also with water efflux. Excess  $\text{Ca}^{2+}$  is actively excreted *via* the kidney, whilst urine flow is reduced. As a consequence, SW-adapted euryhaline teleost fish can produce urine with  $\text{Ca}^{2+}$  concentrations well above plasma levels (Björnsson and Nilsson, 1985; Schmidt-Nielsen and Renfro, 1975; Elger *et al.* 1987). In fresh water (FW), however, euryhaline fish need to minimize urinary  $\text{Ca}^{2+}$  loss, by reabsorbing filtered  $\text{Ca}^{2+}$ . Thus, the tubular epithelium of the nephron mediates both  $\text{Ca}^{2+}$  secretion (in SW) and reabsorption (in FW). It follows that transfer of the fish from FW to SW (or *vice versa*) must have a pronounced effect on the properties of  $\text{Ca}^{2+}$  transport *via* the tubular epithelium.

In mammals,  $\text{Ca}^{2+}$  reabsorption is mainly mediated through a paracellular route and is driven by the transepithelial potential (lumen positive) created by  $\text{Na}^+$  and  $\text{Cl}^-$  movement over the tubular epithelium; only in the distal nephron are hormonally controlled transcellular  $\text{Ca}^{2+}$  reabsorption mechanisms predominant (Friedman and Gesek, 1993). For

freshwater fish, similar  $\text{Na}^+$ - and  $\text{Cl}^-$ -dependent transepithelial potentials have been reported (Nishimura and Imai, 1982). This would suggest that, as in mammals,  $\text{Ca}^{2+}$  reabsorption in fish follows a paracellular route and is driven by the transepithelial potential. However, the principal function of the kidneys of freshwater fish is the excretion of excess water. Reabsorption of water must, therefore, be minimized and this will limit solute-linked, paracellular reabsorption of electrolytes.

The few studies published that have examined the mechanism of renal  $\text{Ca}^{2+}$  handling in fish seem to imply a dependence on ATP-regulated or ATP-driven mechanisms for secretion as well as for absorption of  $\text{Ca}^{2+}$ . Renfro *et al.* (1982) proposed that in sea water winter flounder, *Pseudopleuronectes americanus*, intracellular ATP levels influenced  $\text{Ca}^{2+}$  secretion, whereas  $\text{Na}^+$  movement was not directly involved. More recently, in the kidney of *Gillichthys mirabilis*, a high-affinity  $\text{Ca}^{2+}$ -ATPase was identified, with a presumed function in  $\text{Ca}^{2+}$  reabsorption (Doneen, 1993).

In the euryhaline teleost *Oreochromis mossambicus* (hereafter called tilapia),  $\text{Ca}^{2+}$  transport in both gill and intestinal epithelium is mediated through  $\text{Ca}^{2+}$ -ATPase activity

and  $\text{Na}^+/\text{Ca}^{2+}$  exchange (Flik *et al.* 1985, 1990). The object of this study was to investigate the possible involvement of these transport mechanisms in  $\text{Ca}^{2+}$  handling in the kidneys of tilapia. Assuming that  $\text{Ca}^{2+}$  reabsorption is strongly enhanced in freshwater environments, the kidneys of euryhaline fish offer a model to study the contribution of  $\text{Ca}^{2+}$  transport mechanisms to this process.

### Materials and methods

Tilapia, *Oreochromis mossambicus* (Peters), of both sexes were obtained from laboratory stock. Freshwater-adapted fish were kept in Nijmegen tap water ( $[\text{Ca}^{2+}] = 0.7 \text{ mmol l}^{-1}$ ). Artificial sea water was prepared by adding Wimex sea salt (Wiegandt GMBH and Co., Krefeld, Germany) to tap water until a final concentration of  $1.022 \text{ g l}^{-1}$  was reached ( $[\text{Ca}^{2+}] = 10 \text{ mmol l}^{-1}$ ). Fish were adapted to sea water over a 3-day period by the gradual infusion of sea water into tanks that were initially filled with fresh water. Once full-strength sea water was obtained, the water was constantly filtered and one-third of the volume was replaced weekly. Fish were kept for at least 3 weeks at full-strength salinity before use. The water temperature was  $25^\circ\text{C}$  and the photoperiod was 12 h:12 h light:dark. Fish were fed Trouvit fish pellets (Trouw and Co., Putten, The Netherlands) at daily rations of 1.5% of the fish total mass; the calcium content of the food was  $0.34 \text{ mol kg}^{-1}$ .

#### Membrane isolation

Fish were killed by spinal transection and weighed (FW:  $180 \pm 43 \text{ g}$ , mean mass  $\pm$  s.d.,  $N=13$ ; SW mean mass:  $200 \pm 31 \text{ g}$ ,  $N=12$ ). The abdominal cavity was cut open lengthwise, and the intestinal tract and swim-bladder removed. Kidney tissue was gently excised, weighed (FW mean mass:  $0.328 \pm 0.091 \text{ g}$ ,  $N=13$ ; SW mean mass:  $0.399 \pm 0.118 \text{ g}$ ,  $N=12$ ) and immediately transferred to ice-cold saline containing  $150 \text{ mmol l}^{-1}$  NaCl,  $1 \text{ mmol l}^{-1}$  Hepes,  $1 \text{ mmol l}^{-1}$  1,4-dithiothreitol (DTT) and  $0.1 \text{ mmol l}^{-1}$  EDTA, adjusted to pH 8.0 with Tris. All further steps were performed at  $0-4^\circ\text{C}$ . The renal tissue was disrupted by 30 strokes with a Dounce homogenizer equipped with a loosely fitting pestle in isotonic sucrose buffer containing  $250 \text{ mmol l}^{-1}$  sucrose,  $10 \text{ mmol l}^{-1}$  Hepes,  $1 \text{ mmol l}^{-1}$  DTT and 100 trypsin inhibitor units  $\text{ml}^{-1}$  aprotinin, adjusted to pH 7.4 with Tris, with approximately 0.7 g of kidney tissue in 15 ml of buffer. This homogenization disrupts the complex renal tissue but leaves most blood cells intact. The homogenate was centrifuged for 10 min at  $1400 \text{ g}$  (Heraeus Sepatech Omnifuge 2.0RS, BS4402/A rotor,  $2850 \text{ revs min}^{-1}$ ) to remove nuclei, cellular debris and blood cells. The resulting supernatant was brought to 37% sucrose (w/w) by mixing (5 strokes with the Dounce homogenizer) with 1.25 volumes of sucrose (60% w/w) dissolved in  $10 \text{ mmol l}^{-1}$  Hepes/Tris (pH 7.4). 9 ml of this suspension was overlaid with 3 ml of isotonic sucrose buffer and centrifuged isopycnicly for 90 min at  $200\,000 \text{ g}$  (Beckman L8-80, SW40 Ti rotor,  $40,000 \text{ revs min}^{-1}$ ). The membranes on the interface of the sucrose block and the isotonic buffer were collected in a volume of 0.5 ml and mixed with 12 ml of isotonic buffer, containing the basic ingredients of the assay medium:

$150 \text{ mmol l}^{-1}$  NaCl (for  $\text{Na}^+/\text{Ca}^{2+}$  exchange) or  $150 \text{ mmol l}^{-1}$  KCl (for ATP-dependent  $\text{Ca}^{2+}$  uptake) and  $20 \text{ mmol l}^{-1}$  Hepes/Tris (pH 7.4). The membranes were pelleted by centrifugation for 30 min at  $150\,000 \text{ g}$  (50Ti rotor,  $45\,000 \text{ revs min}^{-1}$ ), rinsed with isotonic buffer and resuspended by 20 passages through a 23 gauge needle in 0.5 ml of assay medium. Membrane preparations contained approximately  $2.1 \text{ mg ml}^{-1}$  protein and were used on the day of isolation without being frozen. Protein concentration was determined with a commercial reagent kit (Biorad), using bovine serum albumin as a reference.

#### Enzyme assays

The marker enzymes used were  $\text{Na}^+/\text{K}^+$ -ATPase for basolateral plasma membranes (Mircheff and Wright, 1976), aminopeptidase for brush border membranes (George and Kenny, 1973; Pfeleiderer, 1970), NADH-cytochrome *c* reductase for endoplasmic reticulum (ER) (Omura and Takesue, 1970) and succinic acid dehydrogenase for mitochondrial fragments (Flik *et al.* 1983). Enzyme activities were assayed after treatment with a detergent,  $0.2 \text{ mg ml}^{-1}$  saponin (10 min,  $25^\circ\text{C}$ ), at a protein concentration of  $1 \text{ mg ml}^{-1}$ , to unmask enzyme activity that was latent as a result of membrane resealing (Flik *et al.* 1990).

Membrane orientation was determined as described previously (Flik *et al.* 1990). The percentage of inside-out orientated vesicles (IOV) was determined on the basis of acetylcholine esterase activity, using digitonin (0.1% w/v, 10 min at  $25^\circ\text{C}$ ) to unmask latent enzyme activity. Determination of the percentage of rightside-out orientated vesicles (ROV) was based on the specific trypsin sensitivity of the cytosol-oriented part of the  $\text{Na}^+/\text{K}^+$ -ATPase. Trypsin was used at  $4500 \text{ BAEE units mg}^{-1}$  membrane protein, where BAEE is *N*-benzoyl-arginine ethyl ester, for 30 min at  $25^\circ\text{C}$ . After quenching the trypsin activity with  $25 \text{ mg ml}^{-1}$  soybean trypsin inhibitor, trypsin-insensitive  $\text{Na}^+/\text{K}^+$ -ATPase activity (representing the ROV membrane fraction) was revealed by treatment with detergent. In controls, trypsin inhibitor was added before the addition of trypsin to allow assessment of total  $\text{Na}^+/\text{K}^+$ -ATPase activity.

#### $\text{Ca}^{2+}$ transport

Transport of  $\text{Ca}^{2+}$  was assayed by means of a rapid filtration technique (Flik *et al.* 1990; Van Heeswijk *et al.* 1984). The composition of the assay medium was  $150 \text{ mmol l}^{-1}$  KCl,  $0.5 \text{ mmol l}^{-1}$  EGTA,  $0.5 \text{ mmol l}^{-1}$  HEEDTA,  $0.5 \text{ mmol l}^{-1}$  nitrilotriacetic acid (NTA),  $0.8 \text{ mmol l}^{-1}$  free  $\text{Mg}^{2+}$ ,  $3 \text{ mmol l}^{-1}$  ATP (Tris-salt, Sigma),  $20 \text{ mmol l}^{-1}$  Hepes/Tris (pH 7.4) and  $5 \mu\text{g ml}^{-1}$  oligomycin B.  $\text{CaCl}_2$  was added to obtain the calculated free  $\text{Ca}^{2+}$  concentrations of  $1.0 \times 10^{-8}$  to  $2.0 \times 10^{-6} \text{ mol l}^{-1}$ .  $^{45}\text{CaCl}_2$  (specific activity  $24 \text{ TBq mol}^{-1}$ , Amersham) was added to the incubation medium to make up a radioactive concentration of approximately  $74 \text{ kBq ml}^{-1}$ . In order to achieve a uniform specific activity of all the  $\text{Ca}^{2+}$  species in the incubation medium, the radiotracer was added at least 30 min prior to experimentation. ATP-dependent uptake

was determined as the difference between  $\text{Ca}^{2+}$  uptake in the presence and in the absence of ATP. Pilot experiments demonstrated that  $\text{Ca}^{2+}$  uptake was linear for approximately 1 min. Therefore, 30 s incubations were used to estimate the initial rate of  $\text{Ca}^{2+}$  uptake. When  $\text{Na}^+/\text{Ca}^{2+}$  exchange was assayed, ATP was omitted from the assay medium and in some cases KCl was replaced by NaCl. Incubations were carried out at 37 °C for optimum enzyme activity. Free  $\text{Ca}^{2+}$  and free  $\text{Mg}^{2+}$  concentrations were calculated according to Schoenmakers *et al.* (1992). In experiments where oxalate ( $2 \text{ mmol l}^{-1}$ ) was included in the assay medium,  $\text{Ca}^{2+}$  and  $\text{Mg}^{2+}$  binding to oxalate was taken into account. Thapsigargin was added from a  $1 \text{ mmol l}^{-1}$  stock solution in ethanol. A23187 (calcimycin) was dissolved in dimethyl sulphoxide (DMSO) and added to the assay medium at  $5 \mu\text{g ml}^{-1}$ . The concentration of solvents in the assay medium did not exceed 0.1 % (v/v). The reaction was quenched by adding 1 ml of ice-cold stop buffer:  $150 \text{ mmol l}^{-1}$  KCl (or NaCl when  $\text{Na}^+/\text{Ca}^{2+}$  exchange was assayed),  $20 \text{ mmol l}^{-1}$  Hepes/Tris, pH 7.4,  $0.8 \text{ mmol l}^{-1}$   $\text{MgCl}_2$ ,  $0.1 \text{ mmol l}^{-1}$   $\text{LaCl}_3$  to 0.15 ml of incubate. A volume of 1 ml, equivalent to 10–20  $\mu\text{g}$  of membrane protein, was then filtered (Schleicher and Schuell, ME25; pore size:  $0.45 \mu\text{m}$ ). Filters were rinsed twice with 2 ml of stop buffer and dissolved in 4 ml of scintillation fluid.  $^{45}\text{Ca}$  specific activity was determined by counting the radioactivity in 0.05 ml of vesicle suspension. Radioactivity was determined in a Pharmacia Wallac 1410 liquid scintillation counter.

#### Calculations and statistics

Values are expressed as mean  $\pm$  standard deviation (s.d.). Data were analyzed with a nonlinear regression data analysis program (Leatherbarrow, 1987). Data were analyzed statistically by the Mann-Whitney *U*-test or the Student's *t*-test when appropriate. Statistical significance was accepted at  $P < 0.05$ .

## Results

### Basolateral membrane isolation and orientation

In Table 1, protein recovery and the recovery and enrichment

of several marker enzymes are listed for freshwater and seawater membrane preparations. Recovery and enrichment of the basolateral membrane marker  $\text{Na}^+/\text{K}^+$ -ATPase did not differ for freshwater and seawater preparations: specific enzymatic activity (SA; expressed as the rate of phosphate release) was  $121 \pm 28 \mu\text{mol h}^{-1} \text{ mg}^{-1}$  protein for freshwater preparations and  $91 \pm 17 \mu\text{mol h}^{-1} \text{ mg}^{-1}$  protein for seawater preparations ( $P = 0.061$ ). The aminopeptidase activity indicates that recovery of brush border membranes is relatively low. NADH-cytochrome *c* reductase recovery, however, was considerable and of special importance since this fraction exhibits  $\text{Ca}^{2+}$  transport activity (see next section for further details).

Plasma membrane orientation of freshwater preparations was  $29 \pm 4$  % IOV ( $N = 5$ ),  $44 \pm 7$  % ROV ( $N = 7$ ) and  $27 \pm 11$  % leaky membranes (calculated value). For seawater preparations, the corresponding percentages are  $42 \pm 6$  % ( $N = 5$ ),  $34 \pm 7$  % ( $N = 5$ ) and  $24 \pm 13$  %, respectively. The seawater preparations contained significantly more IOV orientated vesicles ( $P = 0.004$ ) and fewer ROV orientated vesicles ( $P = 0.035$ ) than the freshwater preparations.

### Thapsigargin inhibition of ATP-dependent $\text{Ca}^{2+}$ uptake

Fig. 1 shows the dose-dependent inhibition of  $\text{Ca}^{2+}$  uptake by thapsigargin. Thapsigargin partly inhibited ATP-dependent  $\text{Ca}^{2+}$  uptake. Maximal inhibition occurred at a thapsigargin concentration of  $0.5 \mu\text{mol l}^{-1}$ . Increasing the thapsigargin concentration to  $5 \mu\text{mol l}^{-1}$  did not have any further effect on  $\text{Ca}^{2+}$  uptake rates. The residual, thapsigargin-insensitive, activities at a  $\text{Ca}^{2+}$  concentration of  $500 \text{ nmol l}^{-1}$  amounted to  $26.1 \pm 0.4$  % for freshwater preparations and  $36.2 \pm 1.3$  % for seawater preparations of the total  $\text{Ca}^{2+}$  uptake. These thapsigargin-insensitive activities divided by the respective IOV percentages for freshwater (29 %) and seawater (42 %) preparations yield the total thapsigargin-insensitive  $\text{Ca}^{2+}$  pump activities of the plasma membranes. These corrected thapsigargin-insensitive activities amount to, for freshwater preparations, 55 % ( $14 \text{ nmol min}^{-1} \text{ mg}^{-1}$  protein) and, for seawater preparations, 57 % ( $5.6 \text{ nmol min}^{-1} \text{ mg}^{-1}$  protein) of the total  $\text{Ca}^{2+}$  pump activity (consisting of the thapsigargin-

Table 1. Relative recoveries and enrichment of marker enzymes in freshwater- and seawater-adapted tilapia kidney plasma membranes

| Marker                             | Recovery (%)       |                    | Enrichment        |                   |
|------------------------------------|--------------------|--------------------|-------------------|-------------------|
|                                    | FW                 | SW                 | FW                | SW                |
| Protein                            | $1.9 \pm 0.7$ (13) | $2.1 \pm 0.3$ (5)  | –                 | –                 |
| Aminopeptidase                     | $3.7 \pm 1.1$ (6)  | $2.9 \pm 0.9$ (4)  | $2.3 \pm 0.6$ (6) | $1.7 \pm 0.7$ (4) |
| $\text{Na}^+/\text{K}^+$ -ATPase   | $15.5 \pm 2.9$ (5) | $15.6 \pm 4.6$ (5) | $7.5 \pm 1.0$ (5) | $7.2 \pm 1.1$ (5) |
| Succinic acid dehydrogenase        | $2.5 \pm 1.1$ (8)  | $2.6 \pm 0.7$ (3)  | $1.3 \pm 0.9$ (8) | $1.4 \pm 0.5$ (3) |
| NADH-cytochrome <i>c</i> reductase | $5.4 \pm 2.0$ (5)  | $6.7 \pm 2.5$ (3)  | $2.8 \pm 1.1$ (5) | $2.9 \pm 0.6$ (3) |

Recovery was calculated as the percentage of the total activity in the plasma membrane fraction relative to that in the initial tissue homogenate. Enrichment was calculated by dividing the specific activity in the plasma membrane fraction by the specific activity in the initial tissue homogenate.

Number of observations is indicated in parentheses.

FW, freshwater-adapted; SW, seawater-adapted membranes.

sensitive activity plus the corrected thapsigargin-insensitive activity). Thapsigargin at  $1 \mu\text{mol l}^{-1}$  completely abolished oxalate stimulation of ATP-dependent  $\text{Ca}^{2+}$  uptake in freshwater and seawater preparations (Fig. 2), indicating complete inhibition of endoplasmic reticulum (ER)-related  $\text{Ca}^{2+}$  uptake. Thapsigargin-insensitive  $\text{Ca}^{2+}$  accumulation was ATP-dependent and was reversed by the  $\text{Ca}^{2+}$  ionophore A23187 (Fig. 3).

#### Kinetics of thapsigargin-insensitive $\text{Ca}^{2+}$ uptake

Kinetic analysis of the  $[\text{Ca}^{2+}]$ -dependence of ATP-

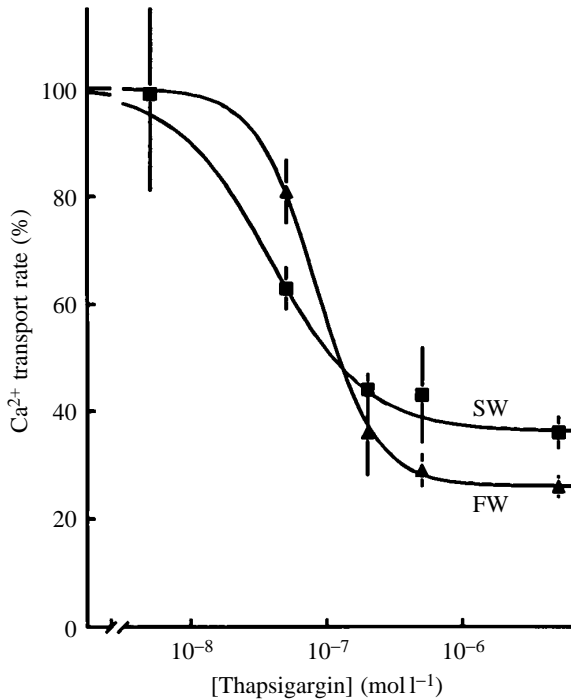

Fig. 1. Dose-dependence of thapsigargin inhibition of ATP-driven  $\text{Ca}^{2+}$  uptake by freshwater (FW,  $\blacktriangle$ ) and seawater (SW,  $\blacksquare$ ) membrane vesicle preparations of renal tissue. Initial rates of uptake were assayed at a free  $\text{Ca}^{2+}$  concentration of  $500 \text{ nmol l}^{-1}$  and corrected for ATP-independent uptake. Transport rates in the absence of thapsigargin were designated 100%. Values depict means  $\pm$  S.D. of three preparations.

Fig. 2. Oxalate-stimulated  $\text{Ca}^{2+}$  uptake by freshwater (A) and seawater (B) tilapia membrane preparations of renal tissue. Values represent the difference ( $\Delta\text{Ca}^{2+}$ ) between  $\text{Ca}^{2+}$  uptake in the presence and in the absence of  $2 \text{ mmol l}^{-1}$  oxalate, at a free  $\text{Ca}^{2+}$  concentration of  $500 \text{ nmol l}^{-1}$ . Thapsigargin ( $1 \mu\text{mol l}^{-1}$ ) completely abolished oxalate stimulation of ATP-dependent  $\text{Ca}^{2+}$  uptake ( $\triangle$ ). ATP-independent  $\text{Ca}^{2+}$  uptake ( $\square$ ) was not stimulated by oxalate. Means  $\pm$  S.D. of three preparations are given.

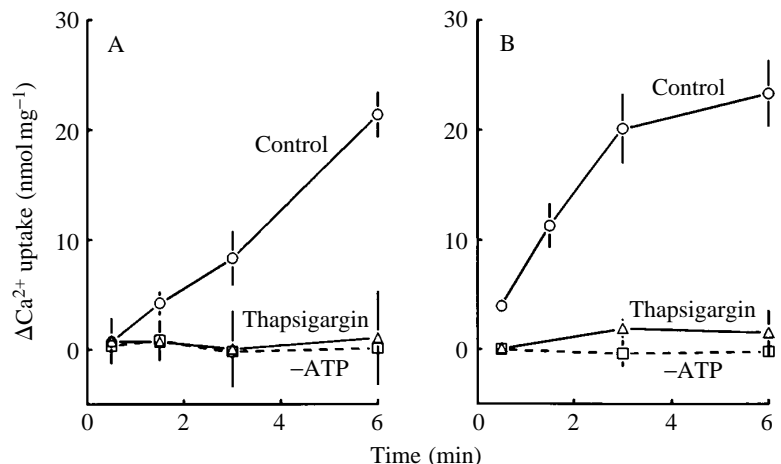

dependent  $\text{Ca}^{2+}$  uptake was performed on individual preparations. Fig. 4 shows the pooled data of five freshwater and five seawater preparations. For freshwater preparations a  $V_m$  of  $4.50 \pm 0.89 \text{ nmol min}^{-1} \text{ mg}^{-1} \text{ protein}$  and a  $K_m$  of  $57 \pm 17 \text{ nmol l}^{-1}$  were calculated. For seawater preparations  $V_m$  decreased to  $2.96 \pm 0.26 \text{ nmol min}^{-1} \text{ mg}^{-1} \text{ protein}$  ( $P=0.008$ ) and  $K_m$  was  $63 \pm 20 \text{ nmol l}^{-1}$ . When appropriate corrections for the percentages of IOV present are made, the calculated values for  $V_m$  are  $16 \text{ nmol min}^{-1} \text{ mg}^{-1} \text{ protein}$  for freshwater preparations and  $7.0 \text{ nmol min}^{-1} \text{ mg}^{-1} \text{ protein}$  for seawater preparations. This amounts to a 56% decrease of renal  $\text{Ca}^{2+}$  pump activity upon transfer to sea water.

#### $\text{Na}^+/\text{Ca}^{2+}$ exchange

Table 2 summarizes data on  $\text{Ca}^{2+}$  uptake in membrane vesicles from freshwater-adapted tilapia, in the absence of ATP. Stimulation of  $\text{Ca}^{2+}$  uptake by applying a  $\text{Na}^+$  gradient could not be demonstrated. No dependence on  $\text{Ca}^{2+}$  concentration was indicated and data did not allow further kinetic analysis.

Table 2. Dependence of  $\text{Ca}^{2+}$  uptake on  $\text{Na}^+$  gradient and  $\text{Ca}^{2+}$  concentration in freshwater tilapia kidney plasma membrane vesicles

| $[\text{Ca}^{2+}]$<br>( $\text{nmol l}^{-1}$ ) | $\text{Ca}^{2+}$ uptake ( $\text{nmol mg}^{-1}$ ) |                          |
|------------------------------------------------|---------------------------------------------------|--------------------------|
|                                                | $[\text{Na}^+]_o^*$                               | $[\text{K}^+]_o^\dagger$ |
| 50                                             | $0.38 \pm 0.23$ (7)                               | $0.32 \pm 0.17$ (7)      |
| 100                                            | $0.60 \pm 0.35$ (9)                               | $0.71 \pm 0.37$ (9)      |
| 250                                            | $0.98 \pm 0.43$ (7)                               | $1.37 \pm 0.95$ (7)      |
| 500                                            | $1.31 \pm 0.68$ (8)                               | $1.41 \pm 0.58$ (8)      |
| 1000                                           | $1.73 \pm 0.41$ (9)                               | $2.16 \pm 0.76$ (9)      |
| 2000                                           | $2.22 \pm 0.67$ (7)                               | $2.68 \pm 0.83$ (7)      |

Values depict  $\text{Ca}^{2+}$  uptake over a 5 s period and are means  $\pm$  S.D.

At all  $\text{Ca}^{2+}$  concentrations tested,  $[\text{K}^+]_o$  values were not significantly different from  $[\text{Na}^+]_o$  values.

\* $\text{Na}^+$ -loaded vesicles in  $150 \text{ mmol l}^{-1} \text{ Na}^+$ ;  $^\dagger \text{Na}^+$ -loaded vesicles in  $150 \text{ mmol l}^{-1} \text{ K}^+$ .

Number of observations is indicated in parentheses.

### Discussion

To study the involvement of active transporters in  $\text{Ca}^{2+}$  reabsorption in the fish kidney, we isolated a membrane fraction from a renal tissue homogenate of tilapia. The separation techniques applied were based on studies of ion transporters in the mammalian kidney (reviewed by Mürer and Gmaj, 1986) and were successfully used in our laboratory for isolation of the basolateral membrane fraction of tilapia enterocytes (Flik *et al.* 1990). The enrichment factor and the

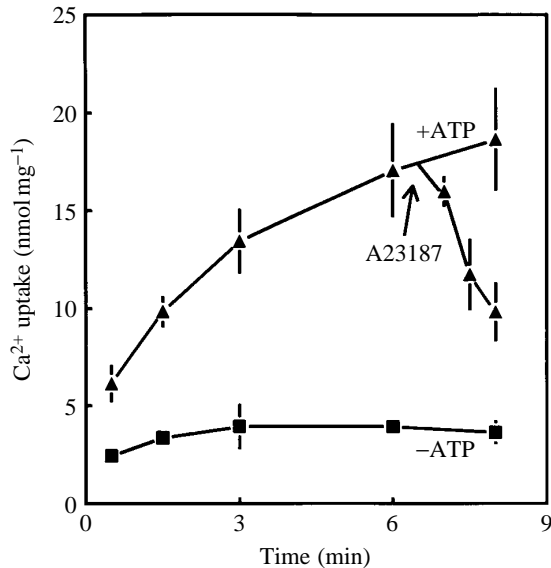

Fig. 3. Thapsigargin-insensitive  $\text{Ca}^{2+}$  uptake in renal membrane preparations from freshwater fish, assayed at a free  $\text{Ca}^{2+}$  concentration of  $500 \text{ nmol l}^{-1}$  and a thapsigargin concentration of  $1 \mu\text{mol l}^{-1}$ . Thapsigargin-insensitive  $\text{Ca}^{2+}$  uptake was stimulated by ATP, and  $\text{Ca}^{2+}$  accumulation was reversed by the addition of the  $\text{Ca}^{2+}$  ionophore A23187 (arrow). Means  $\pm$  S.D. of three experiments are given.

specific enzymatic activity of the basolateral membrane enzyme marker  $\text{Na}^+/\text{K}^+$ -ATPase derived for our preparation are comparable to values reported earlier for tilapia intestinal membranes (Flik *et al.* 1990). Recovery, enrichment and specific activity of the  $\text{Na}^+/\text{K}^+$ -ATPase were not significantly different in freshwater or seawater renal membrane preparations of tilapia, although a decrease of  $\text{Na}^+$  pump activity upon transfer to high ambient salinity has been reported for several other euryhaline species (Doneen, 1993; Trombetti *et al.* 1990; Venturini *et al.* 1992). The high recovery of the ER enzyme marker NADH-cytochrome *c* reductase indicated that our final membrane preparation still contained a considerable proportion of ER fragments. This was confirmed by the  $^{45}\text{Ca}$  uptake studies, which showed that oxalate, which is preferentially transported into ER-derived vesicles (Ponnappa *et al.* 1981), was able to stimulate  $^{45}\text{Ca}$  accumulation by trapping  $^{45}\text{Ca}$  in vesicles. Attempts to enhance the purification of plasma membranes relative to the ER fraction by other initial tissue fragmentation techniques or by further centrifugation on sucrose block gradients ranging from 31 % to 43 %, or on a self-generating Percoll gradient as reported by Van Heeswijk *et al.* (1984), were unsuccessful (results not shown).

We used the highly specific ER  $\text{Ca}^{2+}$ -ATPase inhibitor thapsigargin to inhibit  $^{45}\text{Ca}$  uptake into ER-derived vesicles (Thastrup *et al.* 1990). Our study shows that thapsigargin abolished oxalate-stimulated  $\text{Ca}^{2+}$  uptake, indicating complete inhibition of all ER-related  $\text{Ca}^{2+}$  pump activity. Maximal inhibition was reached at a thapsigargin concentration of  $0.5 \mu\text{mol l}^{-1}$ . The residual  $\text{Ca}^{2+}$  uptake was not affected by an increase in the thapsigargin concentration to  $5 \mu\text{mol l}^{-1}$ , indicating that at these low concentrations thapsigargin inhibits ER  $\text{Ca}^{2+}$ -ATPase activity, but does not have an ionophoretic effect on the membrane vesicles, as reported by Favero and Abramson (1994). Thapsigargin-insensitive  $\text{Ca}^{2+}$  uptake was

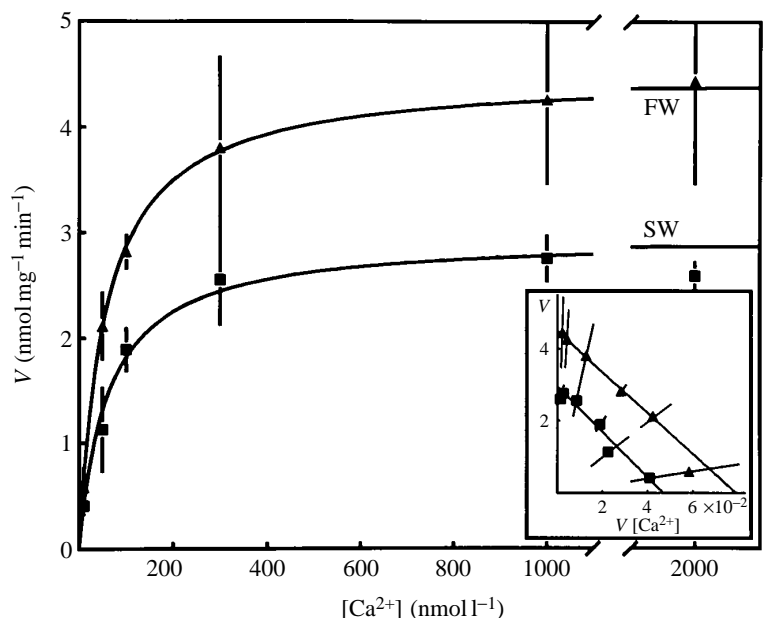

Fig. 4. Kinetics of thapsigargin-insensitive, ATP-dependent  $\text{Ca}^{2+}$  uptake in freshwater (FW,  $\blacktriangle$ ) and seawater (SW,  $\blacksquare$ ) membrane preparations of renal tissue. Initial rates of uptake were corrected for ATP-independent  $\text{Ca}^{2+}$  uptake. Values depict means  $\pm$  S.D. of five preparations. Data of individual preparations were fitted to the Michaelis-Menten equation; for FW,  $V_m=4.50\pm 0.89 \text{ nmol min}^{-1} \text{ mg}^{-1} \text{ protein}$  and  $K_m=57\pm 17 \text{ nmol l}^{-1}$ ; for SW,  $V_m=2.96\pm 0.26 \text{ nmol min}^{-1} \text{ mg}^{-1} \text{ protein}$  and  $K_m=63\pm 20 \text{ nmol l}^{-1}$ . The inset shows an Eadie-Hofstee transformation of the data.  $V$ , transport rate.

stimulated by ATP, and could be reversed by the addition of the  $\text{Ca}^{2+}$  ionophore A23187, indicating uphill  $\text{Ca}^{2+}$  transport. The  $K_m$  values derived for freshwater and seawater preparations indicate that this  $\text{Ca}^{2+}$  pump is activated at intracellular  $\text{Ca}^{2+}$  levels. This strongly suggests that this  $\text{Ca}^{2+}$  pump activity originates from the plasma membrane fraction of the membrane preparation and reflects a mechanism for  $\text{Ca}^{2+}$  extrusion.

We were unable to demonstrate  $\text{Na}^+/\text{Ca}^{2+}$  exchange activity in renal epithelium of tilapia: no significant difference was found between  $\text{Ca}^{2+}$  uptake in the absence and in the presence of a  $\text{Na}^+$  gradient. Results obtained in our laboratory, with membrane preparations of tilapia gill and intestine, using a similar experimental setup, show that application of a  $\text{Na}^+$  gradient stimulates  $\text{Ca}^{2+}$  uptake in these preparations by at least a factor of two. When assaying preparations of kidney and intestine from the same fish simultaneously, only in the intestine preparation could we demonstrate  $\text{Na}^+$ -driven  $\text{Ca}^{2+}$  transport, which excludes a methodological origin for our inability to demonstrate  $\text{Na}^+/\text{Ca}^{2+}$  exchange in renal preparations (results not shown). Furthermore, the addition of the  $\text{K}^+$  ionophore valinomycin to prevent the build-up of a potential difference did not affect  $\text{Ca}^{2+}$  transport rates (results not shown). We tentatively conclude that  $\text{Na}^+/\text{Ca}^{2+}$  exchange activity is low or absent in tilapia kidney and, in the case of low activity, may be obscured by a proportionally large, non-specific  $\text{Ca}^{2+}$  uptake or  $\text{Ca}^{2+}$  binding.

Earlier studies report that euryhaline species maintain  $\text{Ca}^{2+}$  homeostasis upon transfer from fresh water to sea water by reducing renal  $\text{Ca}^{2+}$  reabsorption (Elger *et al.* 1987; Foster, 1976; Schmidt-Nielsen and Renfro, 1975). To evaluate the physiological significance of the identified  $\text{Ca}^{2+}$  pump in renal  $\text{Ca}^{2+}$  handling, we compared its activity in freshwater- and seawater-adapted tilapia. In our experiments, in which freshwater- and seawater-kidney preparations were isolated and assayed simultaneously, the renal  $\text{Ca}^{2+}$  transport capacity of freshwater-adapted fish significantly exceeded that of seawater-adapted fish, indicating that  $\text{Ca}^{2+}$ -pump activity correlates with  $\text{Ca}^{2+}$  reabsorption. At the estimated cytosolic  $\text{Ca}^{2+}$  concentration of  $100 \text{ nmol l}^{-1}$  and at  $25^\circ\text{C}$ , and correcting for the percentage of IOVs present and assuming an activation energy of  $33 \pm 4 \text{ kJ mol}^{-1}$  (Van Heeswijk *et al.* 1984), we calculate a  $\text{Ca}^{2+}$  pump activity of  $5.9 \text{ nmol min}^{-1} \text{ mg}^{-1}$  protein for freshwater preparations. From a protein yield of  $1.1 \pm 0.3 \text{ mg}$  and the percentage found for basolateral membrane recovery, it follows that the  $\text{Ca}^{2+}$  transport capacity amounts to  $6.0 \mu\text{mol h}^{-1} \text{ kg}^{-1}$  fish.

This transport capacity of the  $\text{Ca}^{2+}$  pump is well in line with data on renal  $\text{Ca}^{2+}$  handling in freshwater-adapted fish. From the estimated glomerular filtration rate of  $4 \text{ ml h}^{-1} \text{ kg}^{-1}$  fish for freshwater-adapted species (Hickman and Trump, 1969) and an ultrafiltrable plasma  $\text{Ca}^{2+}$  concentration of  $1.82 \pm 0.29 \text{ mmol l}^{-1}$  ( $N=3$ ), a renal  $\text{Ca}^{2+}$  filtration rate of  $7.3 \mu\text{mol h}^{-1} \text{ kg}^{-1}$  fish can be calculated. Estimating the  $\text{Ca}^{2+}$  excretion at  $2.5 \mu\text{mol h}^{-1} \text{ kg}^{-1}$  fish (Butler, 1993; Elger *et al.* 1987; Oikari and Rankin, 1985; Schmidt-Nielsen and Renfro,

1975; Hickman, 1968), we calculate that a net reabsorption of  $4.8 \mu\text{mol h}^{-1} \text{ kg}^{-1}$  fish occurs, which amounts to 80% of the transporting capacity of the  $\text{Ca}^{2+}$  pump. The high capacity of the  $\text{Ca}^{2+}$  pump relative to the estimated rate for net  $\text{Ca}^{2+}$  reabsorption suggests that in fish, in contrast to mammalian species (Friedman and Gesek, 1993), the transcellular route for  $\text{Ca}^{2+}$  reabsorption prevails. Paracellular reabsorption of solutes may be relatively small because of the low water permeability of the tubular epithelium (as reabsorption of water must be minimized) in the distal part of the nephron (Nishimura and Imai, 1982).

For seawater-adapted fish, a  $\text{Ca}^{2+}$  transporting capacity of  $2.7 \mu\text{mol h}^{-1} \text{ kg}^{-1}$  fish is calculated. The observation that seawater-adapted fish maintain  $\text{Ca}^{2+}$  pump activity even though they have no requirement for net  $\text{Ca}^{2+}$  reabsorption, suggests that part of the pumping activity is required for intracellular  $\text{Ca}^{2+}$  homeostasis. Consequently, the relative contribution of the  $\text{Ca}^{2+}$  pump to reabsorption may be smaller than estimated on the basis of total pump activity and, therefore, reabsorption may require additional  $\text{Ca}^{2+}$  transport mechanisms.

$\text{Ca}^{2+}$  transport *via* the intestine and gill epithelium of freshwater- and seawater-adapted tilapia has been characterized by Schoenmakers *et al.* (1993) and Verbost *et al.* (1994), respectively. Whereas in the epithelium of the intestine  $\text{Na}^+/\text{Ca}^{2+}$  exchange is the predominant mechanism for transcellular  $\text{Ca}^{2+}$  transport, in the gill epithelium the activity of the exchanger was estimated to be only 50% of that of the ATP-driven pump (at prevailing cytosolic  $\text{Ca}^{2+}$  concentrations). This study indicates, however, that transcellular  $\text{Ca}^{2+}$  transport in renal epithelium of tilapia is fully dependent on an ATP-driven pump. The picture that emerges is that  $\text{Ca}^{2+}$  handling by the euryhaline tilapia is controlled by the regulated and differential expression of both  $\text{Ca}^{2+}$  pump and  $\text{Na}^+/\text{Ca}^{2+}$  exchange activities in the three major  $\text{Ca}^{2+}$ -transporting epithelia, i.e. gill, intestine and kidney. It enables the euryhaline tilapia to maintain  $\text{Ca}^{2+}$  homeostasis over a wide range of ambient  $\text{Ca}^{2+}$  concentrations, which is a prerequisite for successful salinity adaptation.

The authors gratefully acknowledge Professor J. J. M. de Goeij for his critical comments during the preparation of the manuscript.

## References

- BJÖRNSSON, B. TH. AND NILSSON, S. (1985). Renal and extra-renal excretion of calcium in the marine teleost, *Gadus morhua*. *Am. J. Physiol.* **248**, R18–R22.
- BUTLER, D. G. (1993). Stanniectomy increases renal magnesium and calcium excretion in freshwater North American eels (*Anguilla rostrata*). *J. exp. Biol.* **181**, 107–118.
- DONEEN, B. A. (1993). High-affinity  $\text{Ca}^{2+}$ - $\text{Mg}^{2+}$ -ATPase in kidney of euryhaline *Gillichthys mirabilis*: kinetics, subcellular distribution and effects of salinity. *Comp. Biochem. Physiol.* **106B**, 719–728.
- ELGER, E., ELGER, B., HENTSCHEL, H. AND STOLTE, H. (1987).

- Adaptation of renal function to hypotonic medium in the winter flounder (*Pseudopleuronectes americanus*). *J. comp. Physiol. B* **157**, 21–30.
- FAVERO, T. G. AND ABRAMSON, J. J. (1994). Thapsigargin-induced  $\text{Ca}^{2+}$  release from sarcoplasmic reticulum and asolectin vesicles. *Cell Calcium* **15**, 183–189.
- FLIK, G., WENDELAAR BONGA, S. E. AND FENWICK, J. C. (1983).  $\text{Ca}^{2+}$ -dependent phosphatase and ATPase activities in eel gill plasma membranes. I. Identification of  $\text{Ca}^{2+}$ -activated ATPase activities with non-specific phosphatase activities. *Comp. Biochem. Physiol.* **76B**, 745–754.
- FLIK, G., SCHOENMAKERS, T. J. M., GROOT, J. A., VAN OS, C. H. AND WENDELAAR BONGA, S. E. (1990). Calcium absorption by fish intestine: the involvement of ATP- and sodium-dependent calcium extrusion mechanisms. *J. Membrane Biol.* **113**, 13–22.
- FLIK, G., VAN RIJS, J. H. AND WENDELAAR BONGA, S. E. (1985). Evidence for high-affinity  $\text{Ca}^{2+}$ -ATPase activity and ATP-driven  $\text{Ca}^{2+}$  transport in membrane preparations of the gill epithelium of the cichlid fish *Oreochromis mossambicus*. *J. exp. Biol.* **119**, 335–347.
- FOSTER, R. C. (1976). Renal hydromineral metabolism in starry flounder, *Platichthys stellatus*. *Comp. Biochem. Physiol.* **55A**, 135–140.
- FRIEDMAN, P. A. AND GESEK, F. A. (1993). Calcium transport in renal epithelial cells. *Am. J. Physiol.* **264**, F181–F198.
- GEORGE, S. G. AND KENNY, A. J. (1973). Studies on the enzymology of purified preparations of brush border from rabbit kidney. *Biochem. J.* **134**, 43–57.
- HICKMAN, C. P., JR (1968). Glomerular filtration and urine flow in the euryhaline southern flounder, *Paralichthys lethostigma*, in sea water. *Can. J. Zool.* **46**, 427–437.
- HICKMAN, C. P. AND TRUMP, B. R. (1969). The kidney. In *Fish Physiology*, Vol. 1: *Excretion, Ionic Regulation and Metabolism* (ed. W. S. Hoar and D. J. Randall), pp. 91–239. New York: Academic Press.
- LEATHERBARROW, R. J. (1987). *A Non-linear Regression Analysis Program for the IBM PC*. Amsterdam: Elsevier Biosoft.
- MIRCHEFF, A. K. AND WRIGHT, E. M. (1976). Analytical isolation of plasma membranes of intestinal epithelial cells: identification of  $\text{Na},\text{K}$ -ATPase rich membranes and the distribution of enzyme activities. *J. Membr. Biol.* **28**, 309–333.
- MURER, H. AND GMAJ, P. (1986). Transport studies in plasma membrane vesicles isolated from renal cortex. *Kidney Int.* **30**, 171–186.
- NISHIMURA, H. AND IMAI, M. (1982). Control of renal function in freshwater and marine teleosts. *Fedn Proc. Fedn Am. Socs exp. Biol.* **41**, 2355–2360.
- OIKARI, A. O. J. AND RANKIN, J. C. (1985). Renal excretion of magnesium in a freshwater teleost, *Salmo gairdneri*. *J. exp. Biol.* **117**, 319–333.
- OMURA, T. AND TAKESUE, S. (1970). A new method for simultaneous purification of cytochrome b5 and NADPH-cytochrome c reductase from rat liver microsomes. *J. Biochem.* **67**, 249–257.
- PFLEIDERER, G. (1970). Particle-bound aminopeptidase from pig kidney. *Meth. Enzymol.* **19**, 514–521.
- PONNAPPA, B. C., DORMER, R. L. AND WILLIAMS, J. A. (1981). Characterization of an ATP-dependent  $\text{Ca}^{2+}$  uptake system in mouse pancreatic microsomes. *Am. J. Physiol.* **240**, G122–G129.
- RENFRO, J. L., DICKMAN, K. G. AND MILLER, D. S. (1982). Effect of  $\text{Na}^+$  and ATP on peritubular Ca transport by the marine teleost renal tubule. *Am. J. Physiol.* **243**, R34–R41.
- SCHMIDT-NIELSEN, B. AND RENFRO, J. L. (1975). Kidney function of the American eel *Anguilla rostrata*. *Am. J. Physiol.* **228**, 420–431.
- SCHOENMAKERS, TH. J. M., VERBOST, P. M., FLIK, G. AND WENDELAAR BONGA, S. E. (1993). Transcellular intestinal calcium transport in freshwater and seawater fish and its dependence on sodium/calcium exchange. *J. exp. Biol.* **176**, 195–206.
- SCHOENMAKERS TH. J. M., VISSER, G. J., FLIK, G. AND THEUVENET, A. P. R. (1992). CHELATOR: an improved method for computing metal ion concentrations in physiological solutions. *BioTechniques* **12**, 870–879.
- THASTRUP, O., CULLEN, P. J., DROBAK, B. K., HANLEY, M. R. AND DAWSON, A. P. (1990). Thapsigargin, a tumour promoter, discharges intracellular  $\text{Ca}^{2+}$  stores by specific inhibition of the endoplasmic reticulum  $\text{Ca}^{2+}$ -ATPase. *Proc. natn. Acad. Sci. U.S.A.* **87**, 2466–2470.
- TROMBETTI, F., VENTRELLA, V., PAGLIARI, A., TRIGARI, G. AND BORGATTI, A. R. (1990).  $\text{Mg}^{2+}$ -dependent ( $\text{Na}^+\text{K}^+$ )- and  $\text{Na}^+$ -ATPases in the kidneys of the gilthead bream (*Sparus auratus* L.). *Comp. Biochem. Physiol.* **97B**, 343–354.
- VAN HEESWIJK, M. P. E., GEERTSEN, J. A. M. AND VAN OS, C. H. (1984). Kinetic properties of the ATP-dependent  $\text{Ca}^{2+}$  pump and the  $\text{Na}^+/\text{Ca}^{2+}$  exchange system in basolateral membranes from rat kidney cortex. *J. Membr. Biol.* **79**, 19–31.
- VENTURINI, G., CATALDI, E., MARINO, G., PUCCI, P., GARIBALDI, L., BRONZI, P. AND CATAUDELLA, S. (1992). Serum ion concentrations and ATPase activity in gills, kidney and oesophagus of European Sea Bass (*Dicentrarchus labrax*, Pisces, Perciformes) during acclimation trials to fresh water. *Comp. Biochem. Physiol.* **103A**, 451–454.
- VERBOST, P. M., SCHOENMAKERS, TH. J. M., FLIK, G. AND WENDELAAR BONGA, S. E. (1994). Kinetics of ATP- and  $\text{Na}^+$ -gradient driven  $\text{Ca}^{2+}$  transport in basolateral membranes from gills of freshwater- and seawater-adapted tilapia. *J. exp. Biol.* **186**, 95–108
